# Supplementary material for: Toxicity and Pharmacokinetic Studies of Lidocaine and Its Active Metabolite, Monoethylglycinexylidide, in Goat Kids
Source: MDPI journal article supplement (doi:10.3390/ani8080142), 2018-08-20
Supplement: s1 [file s1]

a.

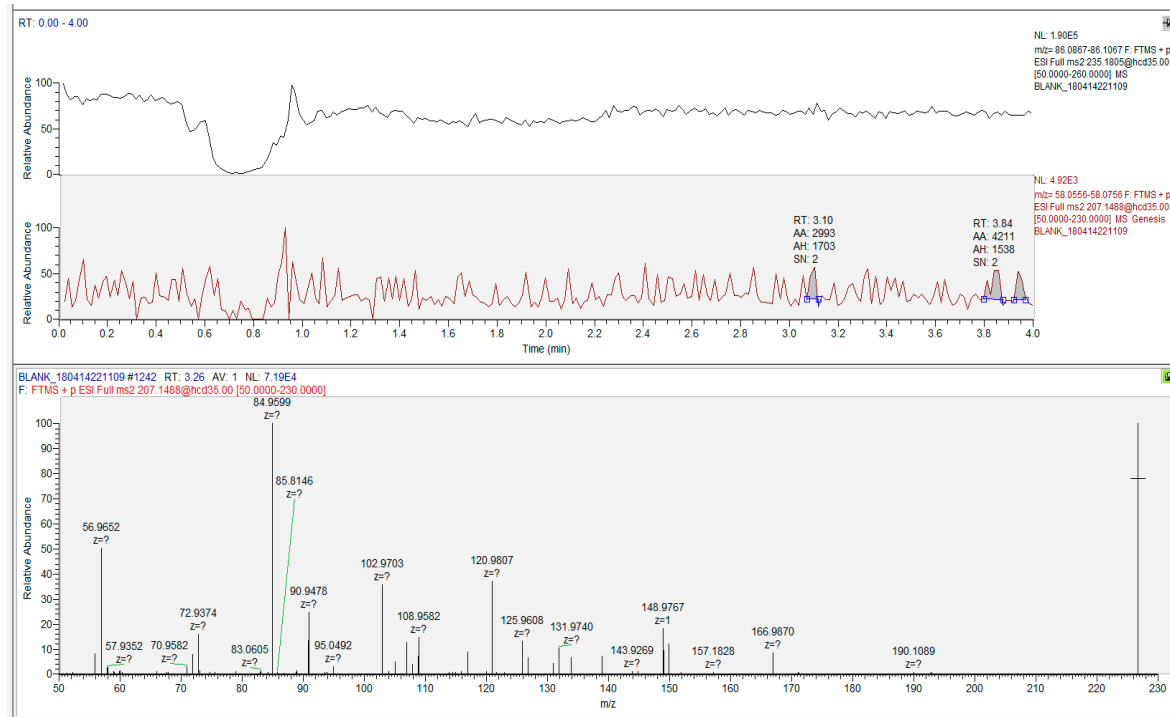

b.

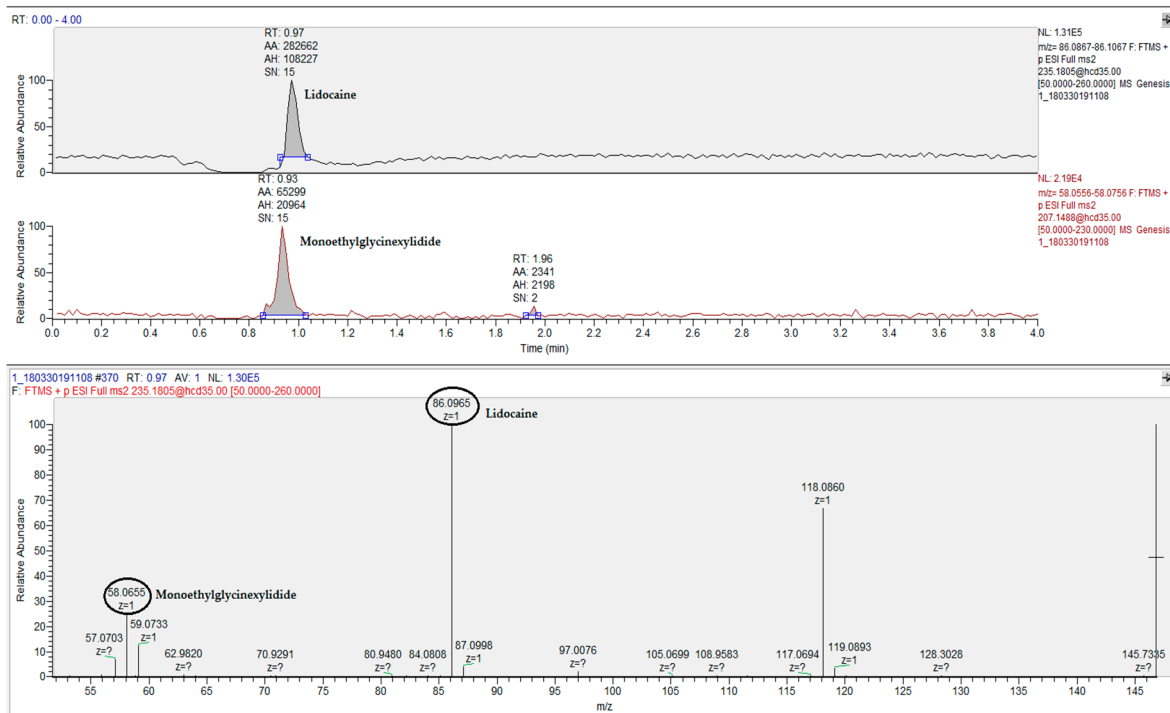

c.

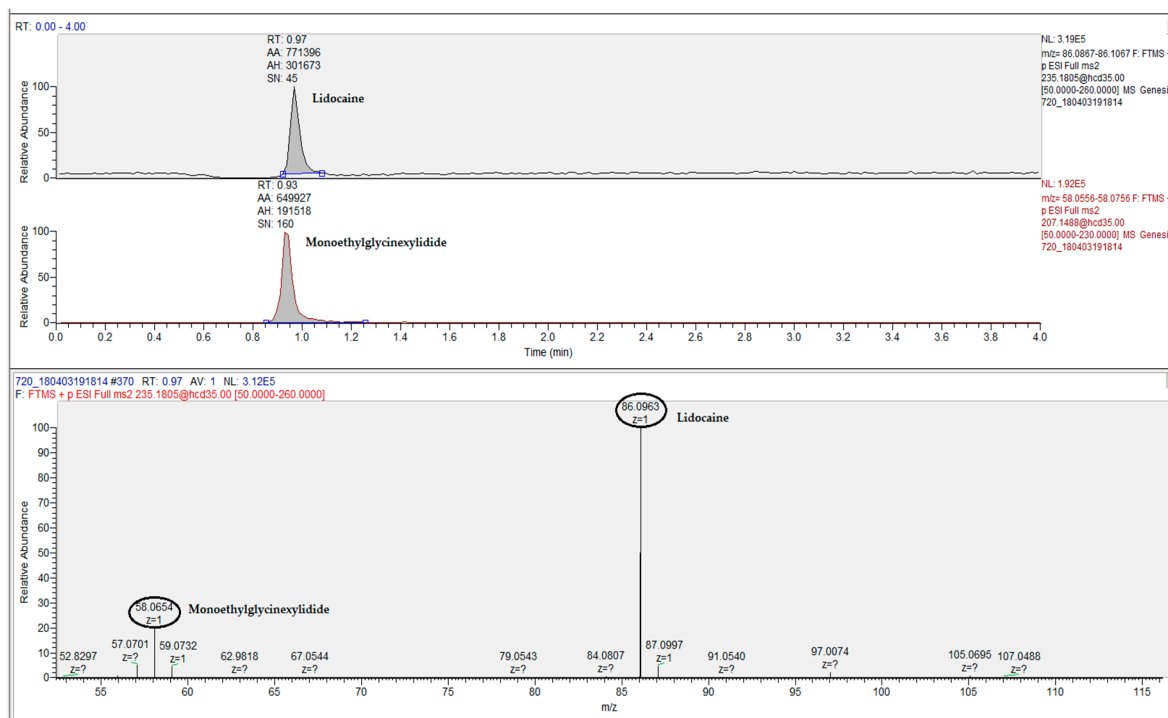

**Supplementary Figure S1.** Chromatograms and mass spectra (obtained in PRM mode) of (a) blank goat plasma, (b) blank plasma spiked with 0.00125 µg/mL of lidocaine and monoethylglycinexylidide, and (c) plasma from an experimental animal after cornual nerve block.

**a.**

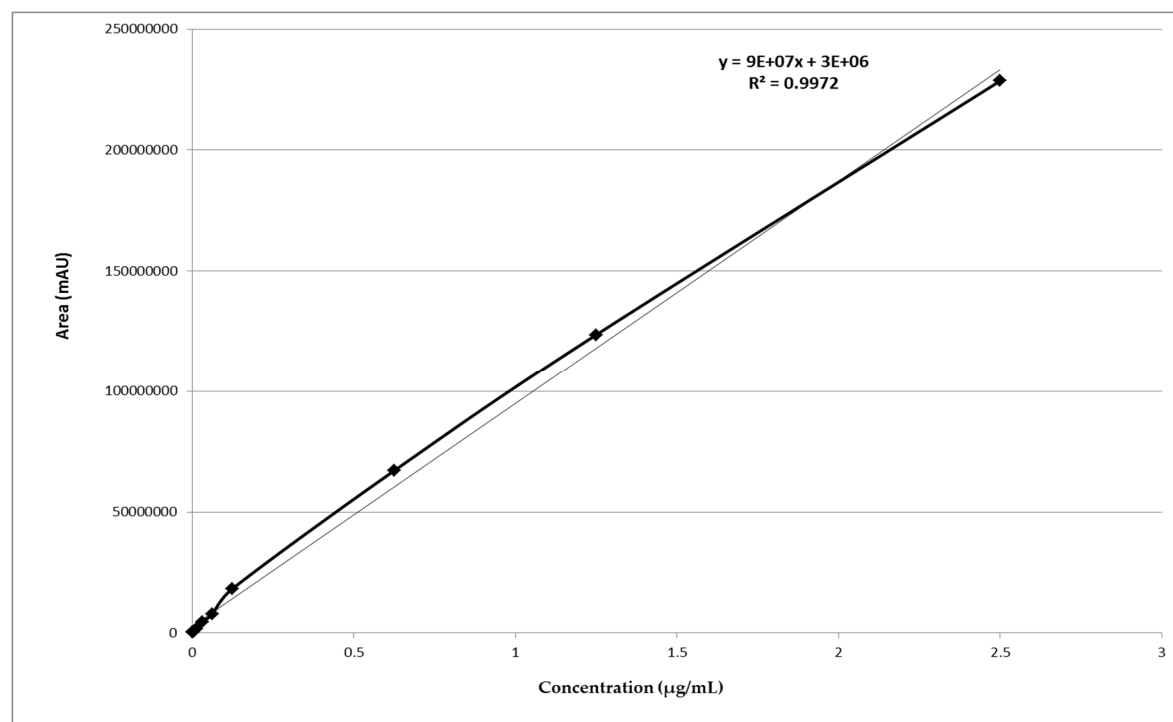

**b.**

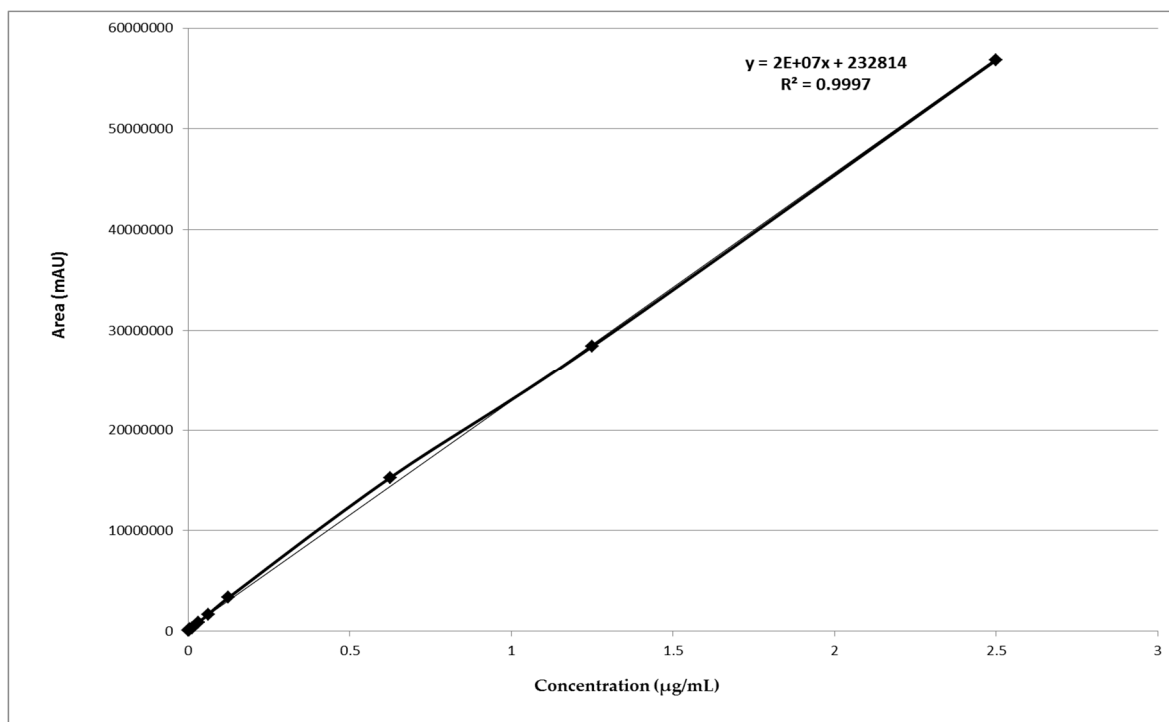

**Supplementary Figure S2.** Calibration curves (0.00125 – 2.50 µg/mL) of lidocaine (a) and monoethylglycinexylidide; (b) constructed by spiking pooled plasma from untreated goat kids.
